# Supplementary material
Source: PubMed Central journal article supplement (PMC10606835)
Supplement: NIHMS1934029-supplement-1.pdf [file NIHMS1934029-supplement-1.pdf]

## Tables

| Keywords used                                                                                                                                                       | Total | Associated Data | Clinical trials | RCT | Review | Systematic review | Metaanalysis | Other (Letters, Commentaries) |
|---------------------------------------------------------------------------------------------------------------------------------------------------------------------|-------|-----------------|-----------------|-----|--------|-------------------|--------------|-------------------------------|
| ("prospective observational cohort" OR "snapshot audit" OR "implementation science") AND "surgery"                                                                  | 1831  | 796             | 79              | 34  | 89     | 42                | 40           | 1035                          |
| ("prospective observational cohort" OR "snapshot audit" OR "implementation science" OR "outcomes research") AND "surgery"                                           | 9095  | 4847            | 588             | 453 | 813    | 404               | 350          | 4248                          |
| ((("General Surgery"[Mesh]) AND ("Implementation Science"[Mesh] OR "Clinical Audit"[Mesh] OR "Outcome Assessment, Health Care"[Mesh] )) AND "Cohort Studies"[Mesh]) | 129   | 34              | 129             | 11  | 0      | 0                 | 0            | 0                             |

*Supplemental Table 1 – Keyword search results from PubMed and MeSH. Filters applied: Clinical Study, Clinical Trial,*

*Comparative Study, Observational Study, Pragmatic Clinical Trial, Randomized Controlled Trial, Humans, English*
